# Supplementary material
Source: PubMed Central journal article supplement (PMC5531169)

# Riese et al., Supplementary Figure 1

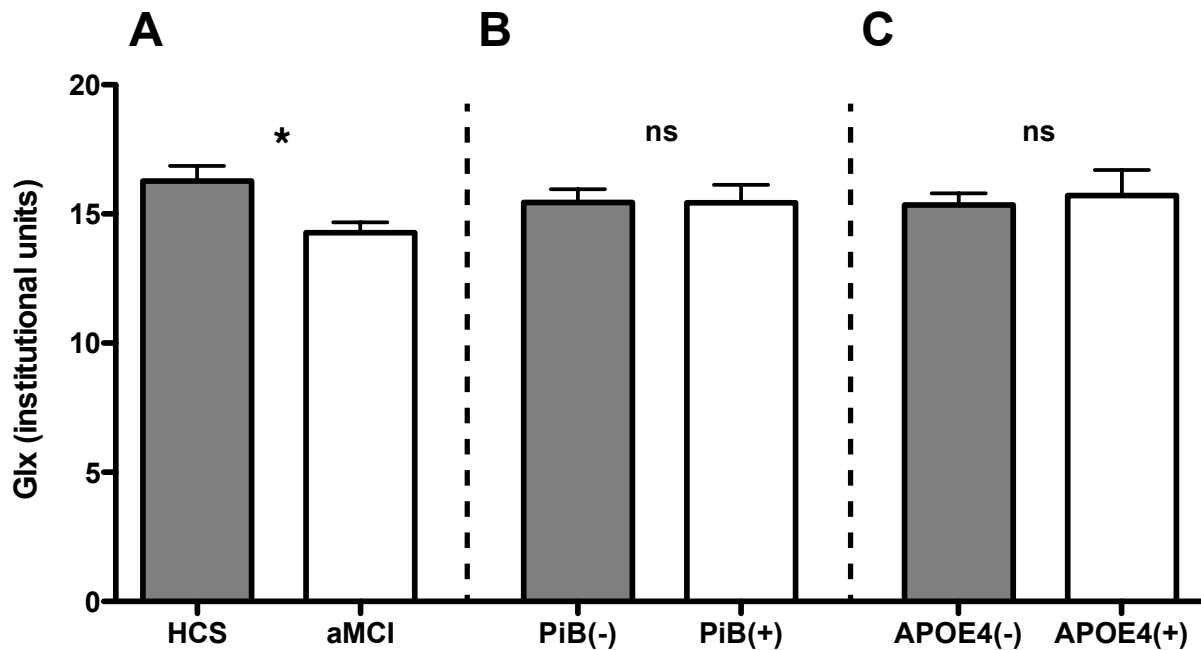

Supplement: NIHMS879531-supplement-Supp_Fig_1.pdf [file NIHMS879531-supplement-Supp_Fig_1.pdf]

# Riese et al., Supplementary Figure 2

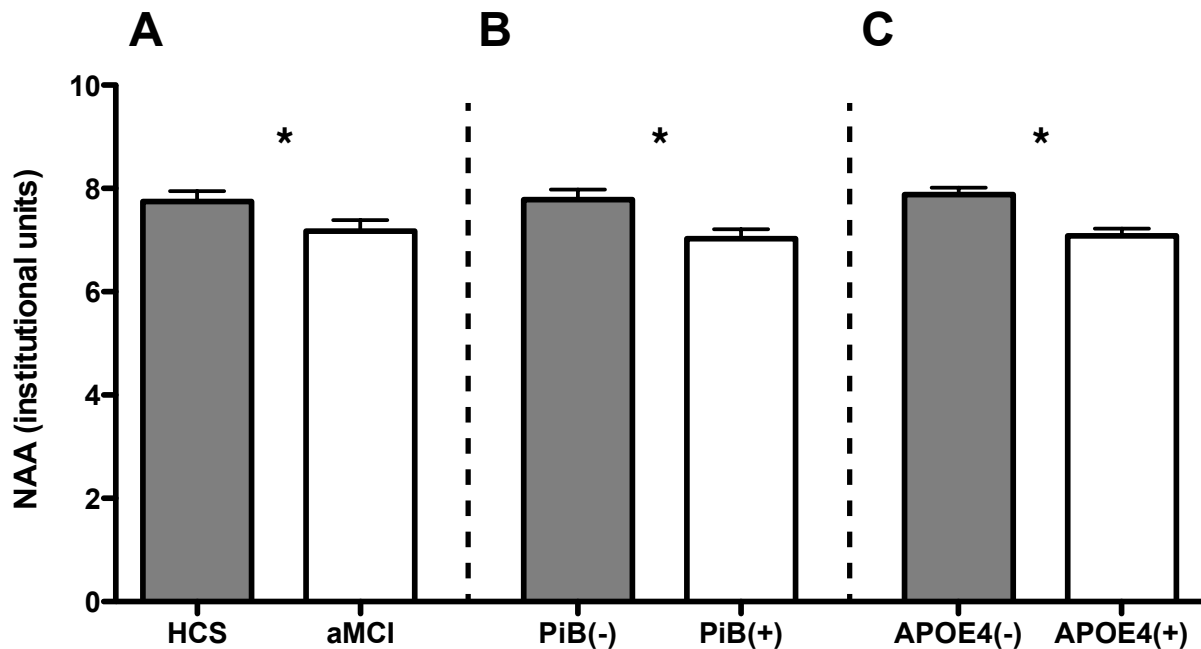

Supplement: NIHMS879531-supplement-Supp_Fig_2.pdf [file NIHMS879531-supplement-Supp_Fig_2.pdf]

# Riese et al., Supplementary Figure 3

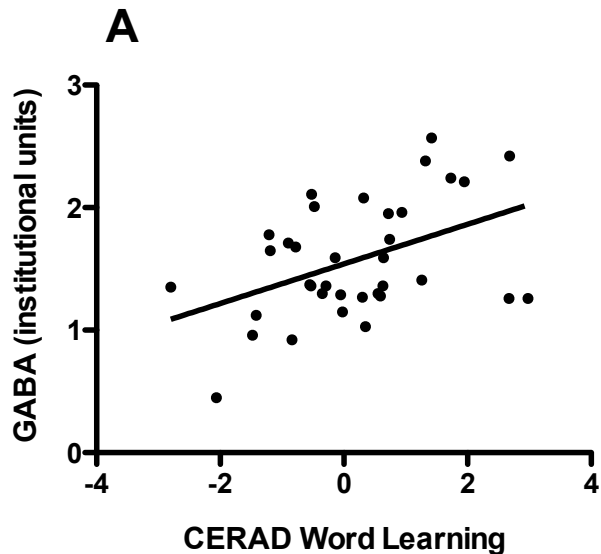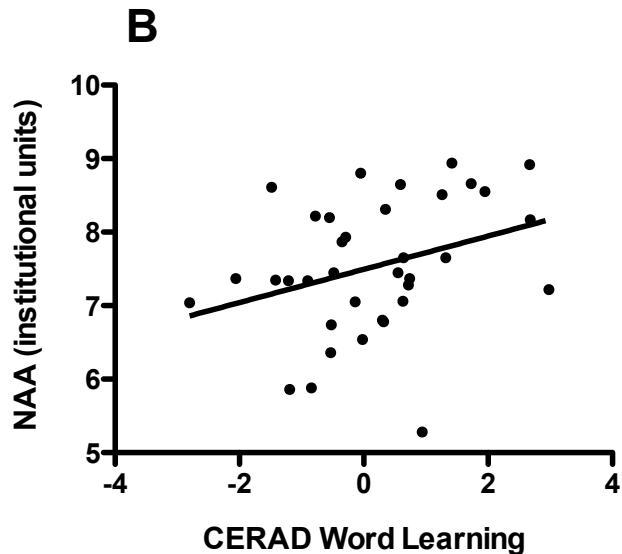

Supplement: NIHMS879531-supplement-Supp_Fig_3.pdf [file NIHMS879531-supplement-Supp_Fig_3.pdf]
